# Supplementary material for: La reencarnación o la ley del Karma
Source: MDPI journal article supplement (doi:10.3390/toxins16020073), 1991-01-01

# Zearalenone Promotes Uterine Hypertrophy through AMPK/mTOR Mediated Autophagy

Lijie Yang, Wenshuang Liao, Jiuyuan Dong, Xiangjin Chen, Libo Huang, Weiren Yang and Shuzhen Jiang

Table S1. Ingredients and nutrient contents of the basal diet (air-dry basis), %.

| Ingredients            | Content | Nutrients                   | Analyzed values |
|------------------------|---------|-----------------------------|-----------------|
| Expanded corn          | 64.43   | Digestible energy, MJ/kg    | 14.53           |
| Whey powder, CP 3%     | 5.00    | Metabolizable energy, MJ/kg | 13.86           |
| Fermented soybean meal | 14.00   | Crude protein               | 18.48           |
| Expanded soybean       | 8.50    | Calcium                     | 0.74            |
| Fish meal, CP 63.28%   | 4.00    | Total phosphorus            | 0.62            |
| CaHPO <sub>4</sub>     | 1.15    | STTD phosphorus             | 0.41            |
| Pulverized Limestone   | 0.70    | ATTD phosphorus             | 0.38            |
| NaCl                   | 0.20    | Lysine                      | 1.38            |
| L-Lysine HCl           | 0.76    | Methionine                  | 0.40            |
| DL-Methionine          | 0.08    | Sulfur amino acid           | 0.66            |
| L-Threonine            | 0.16    | Threonine                   | 0.85            |
| L-Tryptophan           | 0.02    | Tryptophan                  | 0.23            |
| Premix <sup>1)</sup>   | 1.00    |                             |                 |
| Total                  | 100.00  |                             |                 |

Notes: <sup>1)</sup>Supplied per kilogram of diet: vitamin A, 3300 IU; vitamin D<sub>3</sub>, 330 IU; vitamin E, 24 IU; vitamin K<sub>3</sub>, 0.75 mg; vitamin B<sub>1</sub>, 1.50 mg; vitamin B<sub>2</sub>, 5.25 mg; vitamin B<sub>6</sub>, 2.25mg; vitamin B<sub>12</sub>, 0.026 mg; pantothenic acid, 15.00 mg; niacin, 22.50 mg; biotin, 0.075 mg; folic acid, 0.45 mg; Mn (MnSO<sub>4</sub>·H<sub>2</sub>O), 4.00 mg; Fe (FeSO<sub>4</sub>·H<sub>2</sub>O), 90 mg; Zn (ZnSO<sub>4</sub>·H<sub>2</sub>O), 90 mg; Cu (CuSO<sub>4</sub>·5H<sub>2</sub>O), 6.00 mg; I (KIO<sub>3</sub>), 0.14 mg; Se (Na<sub>2</sub>SeO<sub>3</sub>), 0.30 mg.

**Table S2** The condition of RT reaction.

| Ingredients                 | Volume                    |
|-----------------------------|---------------------------|
| 5 × Evo M-MLV RT Master Mix | 4 μL                      |
| Total RNA                   | <1000 ng/RNA              |
| RNase Free water            | up to 20 μL (16-1000/RNA) |

**Table S3** Primers sequences of qRT-PCR.

| Target genes   | Primer sequence (5'-3')                                                            | Product size<br>bp | Location       |
|----------------|------------------------------------------------------------------------------------|--------------------|----------------|
| $\beta$ -actin | F: GGACTTCGAGCAGGAGATGG<br>R: AGGAAGGAGGGCTGGAAGAG<br>F: AGGCGGGGTTTCATCCA         | 138                | XM_021086047.1 |
| BAX            | R:<br>AGACACTCGCTCAACTTCTTGGTAG                                                    | 110                | XM_013998624.2 |
| BCL-2          | F: CCTACCACCACCACCTCTTAC<br>R: TGAGTCAGTCTAGCCAACAACAT                             | 90                 | XM_021099593.1 |
| PCNA           | F:<br>GAGGAGGAAGCAGTTACCATAGA<br>R:                                                | 119                | NM_001291925.1 |
| ATG5           | GACATACTGAGTGTGACTGTAGGA<br>F: CCGCAACCAACAGATTGAAGGA<br>R: CCTCCACCAAACCTGACTGAAG | 107                | NM_001037152.2 |
| ATG7           | F:<br>GACCATGCCATGATTGGACCTGAG<br>R: GCCTGTCAACCTTCTCGCTGTC                        | 133                | NM_001190285.1 |
| ATG9           | F: CCTCGCTCACATCCACTACAT<br>R: GGCTCAGTAACTCCTCCAAGAT                              | 125                | NM_001190275.1 |
| Beclin1        | F: GGTGTCTCTCGCAGATTCATCC<br>R: TCTTCGGCTGAGGTTCTCCAT                              | 117                | NM_001037152.2 |
| LC3            | F: GCCTTCTTCCTGCTGGTGAAC<br>R: ATCCTCATCCTTCTCCTGCTCAT                             | 87                 | NM_001170827.1 |

Notes: BAX, BCL2 associated X; BCL-2 , B-cell lymphoma-2; PCNA, Proliferating cell nuclear antigen; AMPK, AMP-activated protein kinase; mTOR, mammalian target of rapamycin; ATG5, Autophagy related 5; ATG 7, Autophagy related 7; ATG 9, Autophagy related 9; LC3, Microtubule associated protein 1 light chain 3 alpha.

**Table S4** The condition of qRT-PCR.

| Ingredients                     | Volume |
|---------------------------------|--------|
| 2X SYBR Green Pro Taq HS Premix | 10 µL  |
| Forward primer (10 µM)          | 0.4 µL |
| Reverse primer (10 µM)          | 0.4 µL |
| cDNA                            | 2 µL   |
| RNase free water                | 7.2 µL |

**Table S5** Correlation between uterine toxins content and the relative protein expression of autophagy and proliferation related genes.

| Items       | ZEA, ng/g | $\alpha$ -zearalenol, ng/g | $\beta$ -zearalenol, ng/g |
|-------------|-----------|----------------------------|---------------------------|
| p-AMPK/AMPK | 0.909**   | 0.907**                    | 0.907**                   |
| p-mTOR/mTOR | -0.919**  | -0.920**                   | -0.920**                  |
| Beclin1     | 0.956**   | 0.955**                    | 0.955**                   |
| LC3II/I     | 0.916**   | 0.918**                    | 0.918**                   |
| ATG5        | 0.886**   | 0.881**                    | 0.881**                   |
| ATG7        | 0.967**   | 0.965**                    | 0.965**                   |
| ATG9        | 0.971**   | 0.968**                    | 0.968**                   |
| PCNA        | 0.986**   | 0.987**                    | 0.987**                   |
| BCL2        | 0.900**   | 0.896**                    | 0.896**                   |
| BAX         | -0.951**  | -0.952**                   | -0.952**                  |

Notes: BAX, BCL2 associated X; BCL-2 , B-cell lymphoma-2; PCNA, Proliferating cell nuclear antigen; AMPK, AMP-activated protein kinase; mTOR, mammalian target of rapamycin; ATG5, Autophagy related 5; ATG 7, Autophagy related 7; ATG 9, Autophagy related 9; LC3, Microtubule associated protein 1 light chain 3 alpha.

**Table S6.** Correlation of the relative protein expression among the relative protein expression of AMPK/mTOR, proliferation and autophagy related genes.

| Items.          | p-AMPK<br>/AMPK | p-mTOR<br>/mTOR | Beclin1  | LC3II/I  | ATG5     | ATG7     | ATG9     | PCNA     | BCL2     |
|-----------------|-----------------|-----------------|----------|----------|----------|----------|----------|----------|----------|
| p-<br>mTOR/mTOR | -0.918**        |                 |          |          |          |          |          |          |          |
| Beclin1         | 0.943**         | -0.944**        |          |          |          |          |          |          |          |
| LC3II/I         | 0.786**         | -0.893**        | 0.879**  |          |          |          |          |          |          |
| ATG5            | 0.884**         | -0.775**        | 0.876**  | 0.726**  |          |          |          |          |          |
| ATG7            | 0.903**         | -0.876**        | 0.917**  | 0.811**  | 0.924**  |          |          |          |          |
| ATG9            | 0.944**         | -0.916**        | 0.957**  | 0.869**  | 0.952**  | 0.961**  |          |          |          |
| PCNA            | 0.875**         | -0.877**        | 0.933**  | 0.861**  | 0.887**  | 0.966**  | 0.952**  |          |          |
| BCL2            | 0.929**         | -0.821**        | 0.920**  | 0.741**  | 0.975**  | 0.934**  | 0.953**  | 0.929**  |          |
| BAX             | -0.907**        | 0.948**         | -0.930** | -0.953** | -0.800** | -0.880** | -0.923** | -0.898** | -0.834** |

Notes: BAX, BCL2 associated X; BCL-2 , B-cell lymphoma-2; PCNA, Proliferating cell nuclear antigen; AMPK, AMP-activated protein kinase; mTOR, mammalian target of rapamycin; ATG5, Autophagy related 5; ATG 7, Autophagy related 7; ATG 9, Autophagy related 9; LC3, Microtubule associated protein 1 light chain 3 alpha.

**Table S7.** Effect of zearalenone on the relative mRNA expression of p-AMPK/AMPK, p-mTOR/mTOR, autophagy and proliferation apoptosis related genes in the porcine endometrial epithelial cells.

| Items   | Treatment                  |                            |                            |                            | P value   |        |
|---------|----------------------------|----------------------------|----------------------------|----------------------------|-----------|--------|
|         | Control                    | ZEA5                       | ZEA20                      | ZEA40                      | Treatment | Linear |
| ULK1    | 7.23 ± 0.10 <sup>c</sup>   | 7.34 ± 0.14 <sup>c</sup>   | 8.46 ± 0.07 <sup>b</sup>   | 10.06 ± 0.21 <sup>a</sup>  | <0.001    | <0.001 |
| TSC1    | 10.17 ± 0.28               | 10.01 ± 0.03               | 9.85 ± 0.14                | 9.96 ± 0.19                | 0.673     | 0.626  |
| TSC2    | 6.06 ± 0.17 <sup>c</sup>   | 6.15 ± 0.12 <sup>c</sup>   | 7.66 ± 0.08 <sup>b</sup>   | 9.36 ± 0.01 <sup>a</sup>   | <0.001    | <0.001 |
| Rheb    | 181.94 ± 0.51 <sup>a</sup> | 180.27 ± 0.21 <sup>a</sup> | 162.59 ± 1.44 <sup>b</sup> | 151.27 ± 0.46 <sup>c</sup> | <0.001    | <0.001 |
| Beclin1 | 35.67 ± 0.37 <sup>c</sup>  | 35.96 ± 0.18 <sup>c</sup>  | 41.32 ± 0.06 <sup>b</sup>  | 45.17 ± 0.17 <sup>a</sup>  | <0.001    | <0.001 |
| LC3     | 59.13 ± 1.68 <sup>c</sup>  | 61.03 ± 1.88 <sup>c</sup>  | 79.73 ± 1.80 <sup>b</sup>  | 154.01 ± 1.21 <sup>a</sup> | <0.001    | <0.001 |
| ATG5    | 6.31 ± 0.08 <sup>c</sup>   | 6.34 ± 0.04 <sup>c</sup>   | 7.37 ± 0.01 <sup>b</sup>   | 8.27 ± 0.07 <sup>a</sup>   | <0.001    | <0.001 |
| ATG7    | 1.12 ± 0.07 <sup>c</sup>   | 1.14 ± 0.01 <sup>c</sup>   | 1.69 ± 0.01 <sup>b</sup>   | 1.90 ± 0.04 <sup>a</sup>   | <0.001    | <0.001 |
| ATG9    | 0.20 ± 0.01 <sup>c</sup>   | 0.22 ± 0.02 <sup>c</sup>   | 0.45 ± 0.01 <sup>b</sup>   | 0.61 ± 0.03 <sup>a</sup>   | <0.001    | <0.001 |
| PCNA    | 190.80 ± 0.05 <sup>b</sup> | 195.73 ± 0.20 <sup>a</sup> | 184.49 ± 0.79 <sup>c</sup> | 106.53 ± 1.64 <sup>d</sup> | <0.001    | <0.001 |
| BCL2    | 0.65 ± 0.01 <sup>b</sup>   | 0.83 ± 0.01 <sup>a</sup>   | 0.60 ± 0.01 <sup>c</sup>   | 0.56 ± 0.01 <sup>d</sup>   | <0.001    | 0.008  |
| BAX     | 82.63 ± 0.77 <sup>c</sup>  | 76.95 ± 0.77 <sup>d</sup>  | 86.54 ± 1.10 <sup>b</sup>  | 90.65 ± 1.21 <sup>a</sup>  | <0.001    | <0.001 |

Notes: BAX, BCL2 associated X; BCL-2, B-cell lymphoma-2; PCNA, Proliferating cell nuclear antigen; AMPK, AMP-activated protein kinase; mTOR, mammalian target of rapamycin; ATG5, Autophagy related 5; ATG 7, Autophagy related 7; ATG 9, Autophagy related 9; LC3, Microtubule associated protein 1 light chain 3 alpha; Rheb, Ras homologue enriched in brain; TSC1, tuberous sclerosis protein 1; TSC2, tuberous sclerosis protein 2; ULK1, UNC-51-like kinase 1.

Figure S1 Effects of ZEA on cells viability of porcine endometrial epithelial cells.

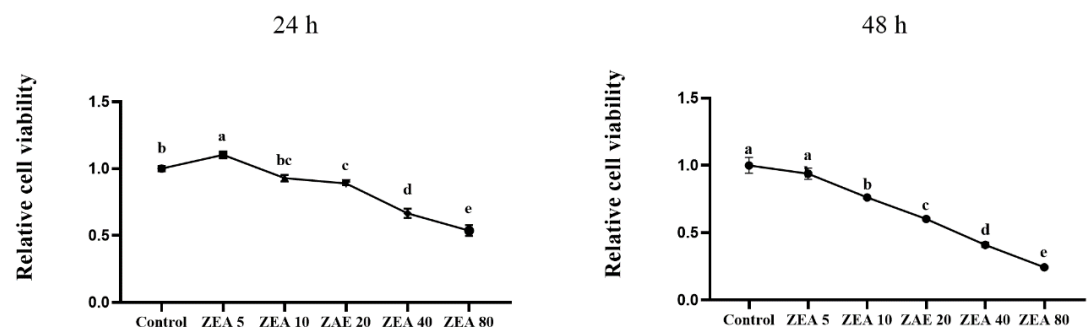



**Figure S2** Effects of zearalenone (ZEA) on the protein relative expression of related genes in the uterus of gilts.

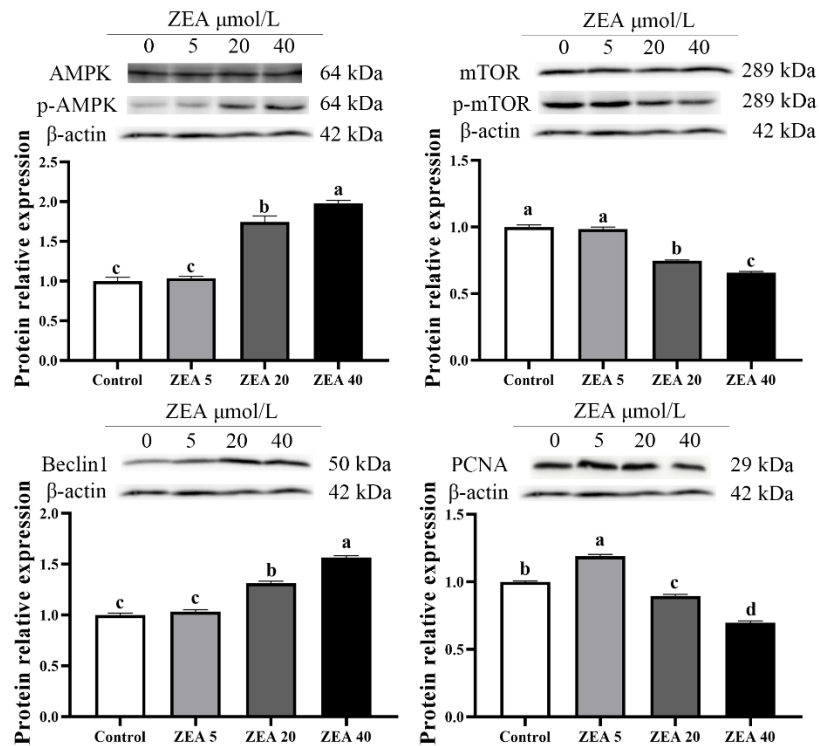

Supplement: s1 [file s1]
